# Supplementary material for: Multilevel regulation of HIF-1 signaling by TTP
Source: PubMed Central journal article supplement — Mol Biol Cell. 2012 Oct 15;23(20):4129–41. doi: 10.1091/mbc.E11-11-0949 (PMC3469526; doi:10.1091/mbc.e11-11-0949), 2012-10-15
Supplement: supp_E11-11-0949v1_CombinedSupMats.pdf [file supp_E11-11-0949v1_CombinedSupMats.pdf]

## Supplement

**Table S1:** Top 20 list of mRNAs that have highest average evolutionary conservation in their mRNA 3'UTRs with length larger than 1,000 nucleotides.

| Order | Gene-ID      | Symbol  | Name                                                                       | 3'-UTR length (nt) | chromosome |
|-------|--------------|---------|----------------------------------------------------------------------------|--------------------|------------|
| 1     | NM_024721    | ZFHX4   | zinc finger homeobox 4                                                     | 2720               | chr8       |
| 2     | NM_006489    | NOVA1   | neuro-oncological ventral antigen 1                                        | 2076               | chr14      |
| 3     | NM_015384    | NIPBL   | Nipped-B homolog                                                           | 1796               | chr5       |
| 4     | NM_005911    | MAT2A   | methionine adenosyltransferase II                                          | 1508               | chr2       |
| 5     | NM_014795    | ZEB2    | zinc finger E-box binding homeobox 2                                       | 1435               | chr2       |
| 6     | NM_001017371 | SP3     | Sp3 transcription factor                                                   | 1411               | chr2       |
| 7     | NM_015646    | RAP1B   | RAP1B, member of RAS oncogene family                                       | 1315               | chr12      |
| 8     | NM_021140    | KDM6A   | lysine (K)-specific demethylase 6A                                         | 1189               | chrX       |
| 9     | NM_014515    | CNOT2   | CCR4-NOT transcription complex, subunit 2                                  | 1078               | chr12      |
| 10    | NM_001788    | SEPT7   | septin 7                                                                   | 1014               | chr7       |
| 11    | NM_001356    | DDX3X   | DEAD (Asp-Glu-Ala-Asp) box polypeptide 3, X-linked                         | 2552               | chrX       |
| 12    | NM_014612    | FAM120A | family with sequence similarity 120A                                       | 1575               | chr9       |
| 13    | NM_004432    | ELAVL2  | ELAV (embryonic lethal, abnormal vision, Drosophila)-like 2 (Hu antigen B) | 2452               | chr9       |
| 14    | NM_031371    | ARID4B  | AT rich interactive domain 4B (RBP1-like)                                  | 1630               | chr1       |
| 15    | NM_002398    | MEIS1   | Meis homeobox 1                                                            | 1514               | chr2       |
| 16    | NM_172316    | MEIS2   | Meis homeobox 2                                                            | 1429               | chr15      |
| 17    | NM_181054    | HIF1A   | Hypoxia inducible factor 1, $\alpha$ subunit                               | 1320               | chr14      |
| 18    | NM_025133    | FBXO11  | F-box protein 11                                                           | 1198               | chr2       |
| 19    | NM_005859    | PURA    | purine-rich element binding protein A                                      | 1586               | chr5       |
| 20    | NM_181892    | UBE2D3  | ubiquitin-conjugating enzyme E2D 3 (UBC4/5 homolog, yeast)                 | 1485               | chr4       |

**Table S2:** List of qPCR-primers used in this study.

| Primer                               | Sequence                           |
|--------------------------------------|------------------------------------|
| 5' $\beta$ 2 Macroglobulin (forward) | 5'-tga ctt tgt cac agc cca aga ta  |
| 3' $\beta$ 2 Macroglobulin (reverse) | 5'-aaa tgc ggc atc ttc aaa cc      |
| 5' $\beta$ -Actin (forward)          | 5'-ccg cga gca cag ctt ct          |
| 3' $\beta$ -Actin (reverse)          | 5'-ggg tac ttc agg gtc agg at      |
| 5' HIF1- $\alpha$ (forward)          | 5'-cag ccg ctg gag aca caa tca tat |
| 3' HIF1- $\alpha$ (reverse)          | 5'-ttc ttg att gag tgc agg gtc agc |
| 5' Adrenomedullin (forward)          | 5'-gga tgc cgc ccg cat ccg ag      |
| 3' Adrenomedullin (reverse)          | 5'-gac acc aga gtc cga ccc gg      |
| 5' VEGF- $\beta$ (forward)           | 5'-gcc agt gtg aat gca gac c       |
| 3' VEGF- $\beta$ (reverse)           | 5'-gtg tca cct tcg cag ctt c       |
| 5' 18S rRNA (forward)                | 5'-gag gta gtg acg aaa aat aac aat |
| 3' 18S rRNA (reverse)                | 5'-ttg ccc tcc aat gga tcc t       |
